# Supplementary material for: Volume and Functional Changes of Remnant Pancreas After Different Types of Pancreatectomy: Exploring the Regenerative Potential
Source: Research Square preprint supplement (doi:10.21203/rs.3.rs-7219476/v1), 2025-08-22
Supplement: Supplementary file 1 [file 219be016e88c3e2a66d06be5.docx]

| **Supplementary Table 1.** Relationship between peri-operative factors and volume change in PD group | | |
| --- | --- | --- |
| **Variable** | **GEE** | |
| **β±SE** | **p-value** |
| Age | -0.08±0.23 | 0.736 |
| Male | 1.32±4.27 | 0.758 |
| Malignant | -7.97±5.48 | 0.146 |
| Pre-op jaundice | 5.57±4.79 | 0.245 |
| Pre-op pancreatitis | -2.67±5.85 | 0.649 |
| Pre-op DM | -1.34±5.44 | 0.806 |
| BMI | 0.99±0.68 | 0.145 |
| PD dilatation | -9.82±4.43 | 0.027* |
| The result was obtained by univariate analysis. Pre-op, pre-operative; BMI, body mass index; DM, diabetes mellitus; PD, pancreatic duct | | |

| **Supplementary Table 2.** Relationship between peri- operative factors and volume change in DP group | | |
| --- | --- | --- |
| **Variable** | **GEE** | |
| **β±SE** | **p-value** |
| Age | 0.07±0.19 | 0.710 |
| Male | -0.86±4.82 | 0.858 |
| Malignant | -8.75±5.25 | 0.095 |
| Pre-op CT | 9.09±8.93 | 0.309 |
| Pre-op pancreatitis | 2.51±6.24 | 0.688 |
| Pre-op DM | -4.20±5.53 | 0.448 |
| BMI | 0.60±0.79 | 0.447 |
| Spleen preservation | 10.86±6.30 | 0.084 |
| The result was obtained by univariate analysis. Pre-op, pre-operative; CT, chemotherapy; DM, diabetes mellitus; BMI, body mass index | | |

| **Supplementary Table 3.** Incidence of new-onset DM at different periods | | | | | |
| --- | --- | --- | --- | --- | --- |
|  | **Incidence of new-onset DM (%)** | | |  | |
| **Within 3M** | **3M-1Y** | **1Y-2Y** |  | **p-value** |
| **Total** | 8.89 (8/82) | 13.41 (11/71) | 5.63(4/57) |  | 0.415 |
| **DP** | 12.5(3/24) | 19.05 (4/21) | 5.88 (1/17) |  | 0.505 |
| **PD** | 7.58 (5/66) | 11.48 (7/61) | 5.56 (3/54) |  | 0.523 |
| DP, distal pancreatectomy; PD,pancreaticoduodenectomy; p-value was obtained by using Fisher exact test | | | | | |

| **Supplementary Table 4.** Univariate analysis for the relationship between peri-operative factors and new-onset DM | | | | | |
| --- | --- | --- | --- | --- | --- |
|  | **PD** | |  | **DP** | |
| **Variables** | **Adjusted OR**  **(95 % CI)** | **p-value** | **Variables** | **Adjusted OR**  **(95 % CI)** | **p-value** |
| Age | 1.02 (0.95-1.10) | 0.589 | Age | 1.02 (0.92-1.14) | 0.707 |
| Male | 3.04 (0.56-16.37) | 0.196 | Male | 1.15 (0.01-156.43) | 0.955 |
| Malignant | 7.42 (0.66-83.73) | 0.105 | Malignant | 0.26 (0.01-7.24) | 0.424 |
| Pre-op jaundice | 0.69 (0.14-3.48) | 0.649 | Pre-op CT | 1.38 (0.01-215.88) | 0.901 |
| Pre-op pancreatitis | 1.62 (0.26-10.02) | 0.607 | Pre-op pancreatitis | 0.058 (<0.001-3.985) | 0.187 |
| BMI | 0.91 (0.73-1.14) | 0.422 | BMI | 1.10 (0.68-1.79) | 0.691 |
| PD dilatation | 2.53 (0.50-12.80) | 0.262 | Spleen preserving | 0.035 (<0.001-12.065) | 0.261 |
| Original pancreatic volume (L) | 1.01 (0.98-1.04) | 0.690 | Original pancreatic volume (L) | 1.02 (0.91-1.14) | 0.736 |
| Pre-op C-peptide level | 1.12 (0.88-1.42) | 0.354 | Pre-op C-peptide level | 0.86 (0.08-9.68) | 0.903 |
| Univariate logistic regression showed no significant relationship between the presented perioperative factors and new onset DM. | | | | | |

| **Supplementary Table 5.** Univariate analysis for the relationship between postoperative volume/C-peptide level and new-onset DM | | | | | |
| --- | --- | --- | --- | --- | --- |
|  | **Univariate logistic regression** | | | | |
|  | **PD** | |  | **DP** | |
| **Variables** | **OR (95 % CI)** | **p-value** |  | **OR (95 % CI)** | **p-value** |
| **Residual volume** |  |  |  |  |  |
| IRV (ml) | 0.993 (0.963- 1.020) | 0.617 |  | 0.922 (0.827- 1.004) | 0.088 |
| IRV (%) | 0.086 (0.003- 1.592) | 0.111 |  | 0.368 (0.00016- 703.591) | 0.792 |
| Volume at 3m (%) | 0.205 (0.009- 3.564) | 0.292 |  | 2.947 (0.013- 839.740) | 0.689 |
| Volume at 1Y (%) | 0.108 (0.004- 2.326) | 0.166 |  | 0.276 (0.0032- 13.691) | 0.533 |
| Volume at 2Y (%) | 0.033 (0.001- 0.770) | 0.045 |  | 0.697 (0.00065- 548.334) | 0.914 |
| **C-peptide level (ng/ml)** |  | | | | |
| Post-op 3months | 3.120 (0.645-24.74) | 0.185 |  | 0.762 (0.106-4.239) | 0.753 |
| Post-op 1 year | 1.540 (0.451-6.147) | 0.485 |  | 0.646 (0.110-2.824) | 0.579 |
| Post-op 2 years | 0.471 (0.067-2.698) | 0.411 |  | 1.131 (0.080-14.49) | 0.919 |
| IRV, initial residual volume; Odds ratio (OR) and p-value was obtained by univariate logistic regression | | | | | |
