# Supplementary material for: Volume and Functional Changes of Remnant Pancreas After Different Types of Pancreatectomy: Exploring the Regenerative Potential
Source: Research Square preprint supplement (doi:10.21203/rs.3.rs-7219476/v1), 2025-08-22
Supplement: Supplementary file 2 [file ea0102d16f9db2710d19671b.docx]

|  | 3M | 1Y | 2Y |
| --- | --- | --- | --- |
| **DP** | **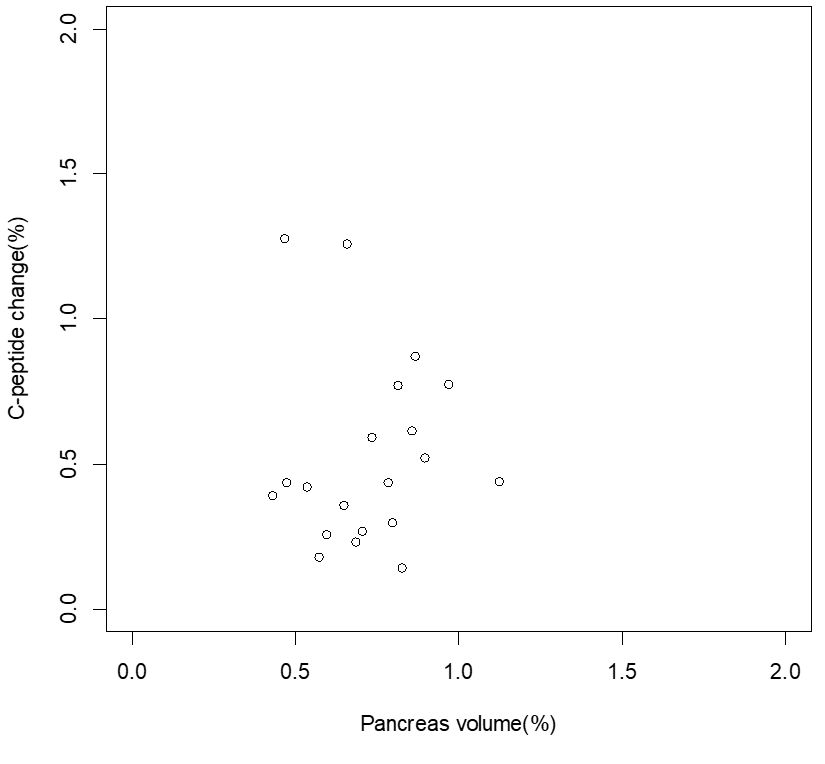** | **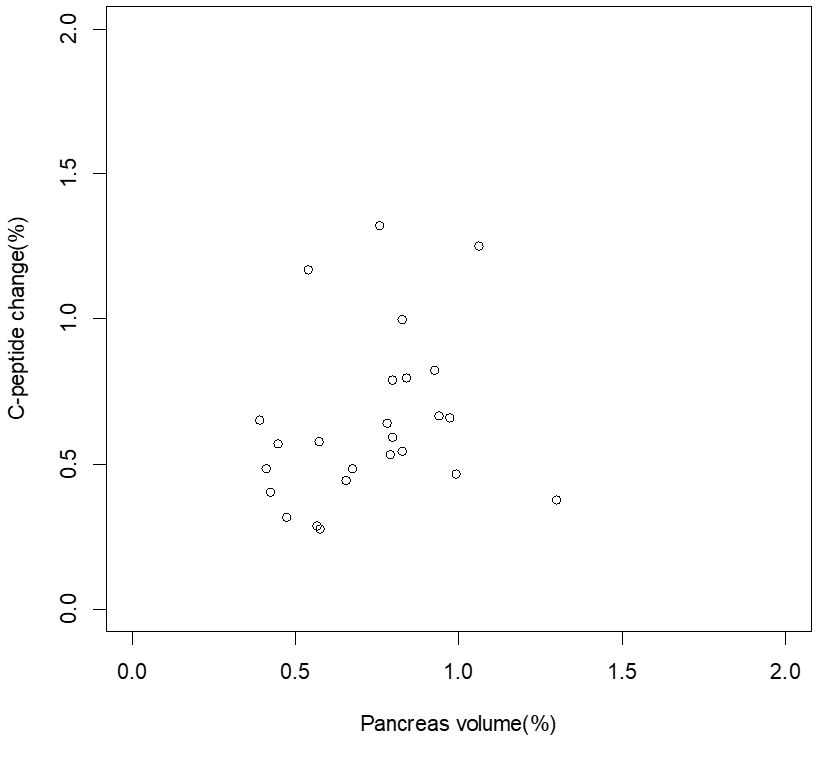** | **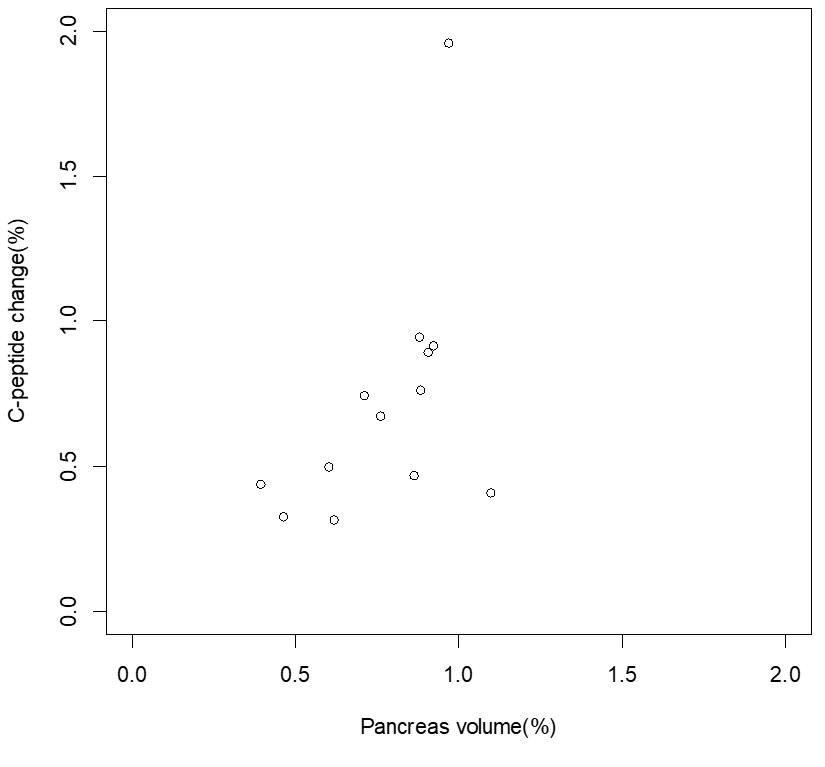** |
|  | ơ =0.238  p= 0.32 | ơ =0.327  p= 0.11 | ơ =0.566  p= 0.05* |
| **PD** | 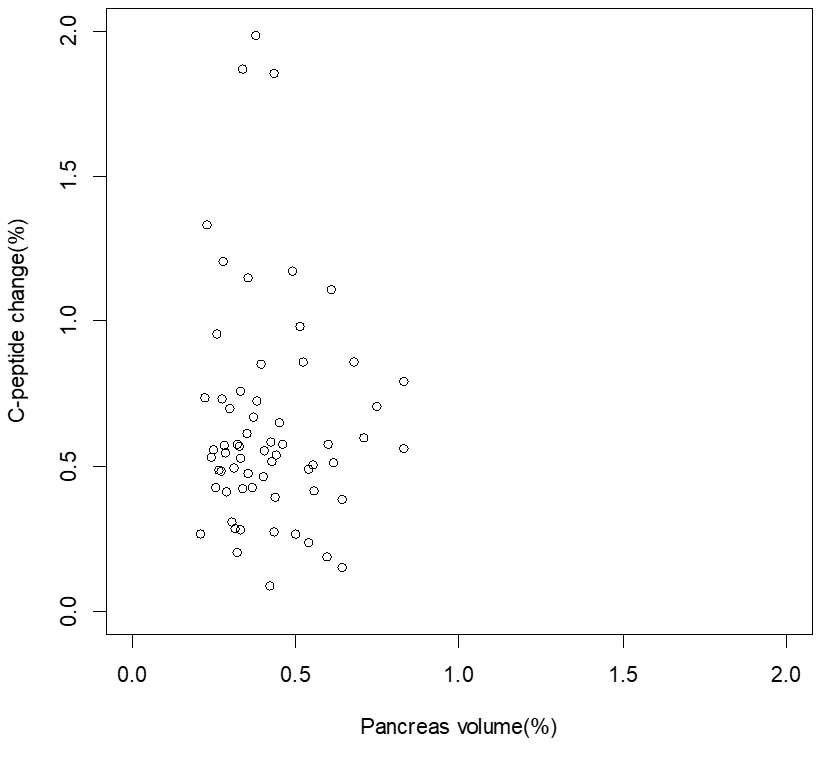 | 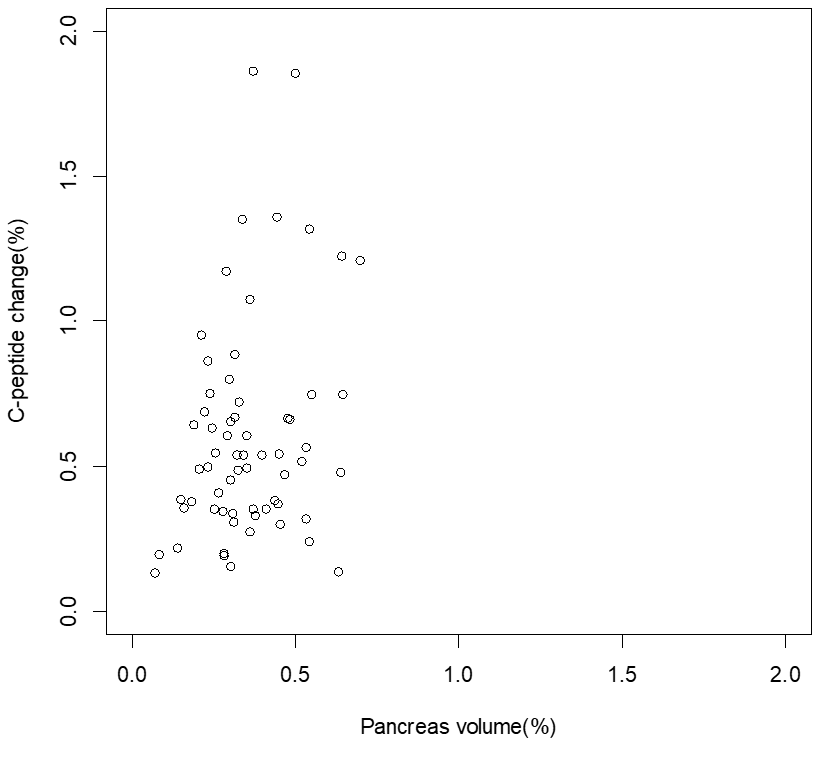 | 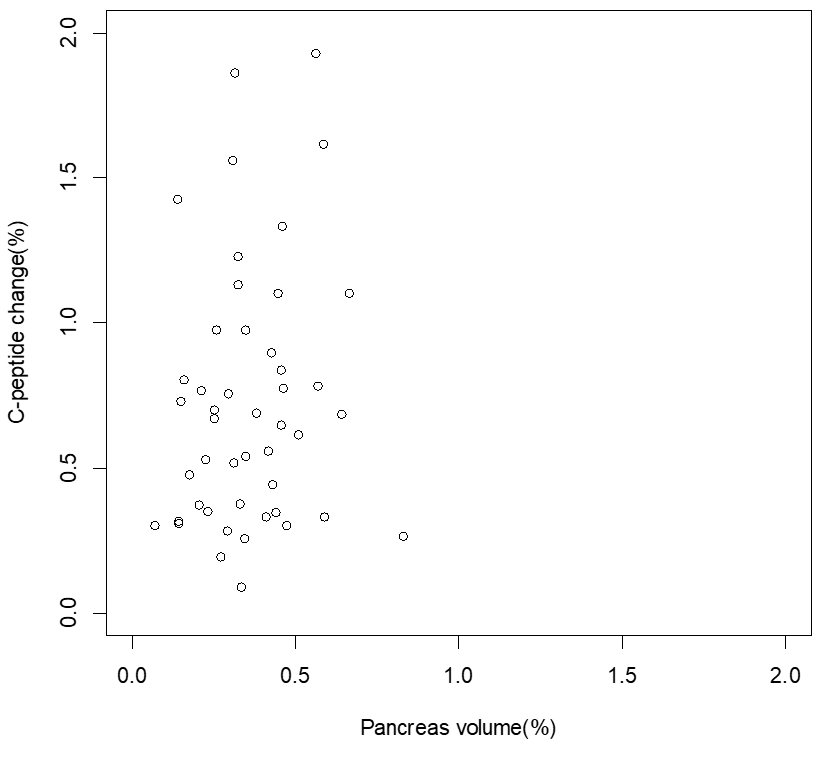 |
|  | ơ =-0.005  p = 0.97 | ơ = 0.149  p = 0.33 | ơ =0.157  p= 0.29 |
| **Supplementary Figure 1.** Relationship between change of C-peptide level (%) and pancreas volume (%) at different time point. Spearman’s correlation showed no significant correlation between C-peptide level and residual volume at postoperative 3 months, 1year and 2years. | | | |
